# Supplementary material for: Multiphoton Multispectral Fluorescence Lifetime Tomography for the Evaluation of Basal Cell Carcinomas
Source: PLOS journal article supplement (doi:10.1371/journal.pone.0043460), 2012-09-11

**Figure S1** - Spectrally resolved FLIM images from a sample of normal skin taken at several depths. (Figure 1 j-n shows only the 425-525 nm (green) channel of this data.)

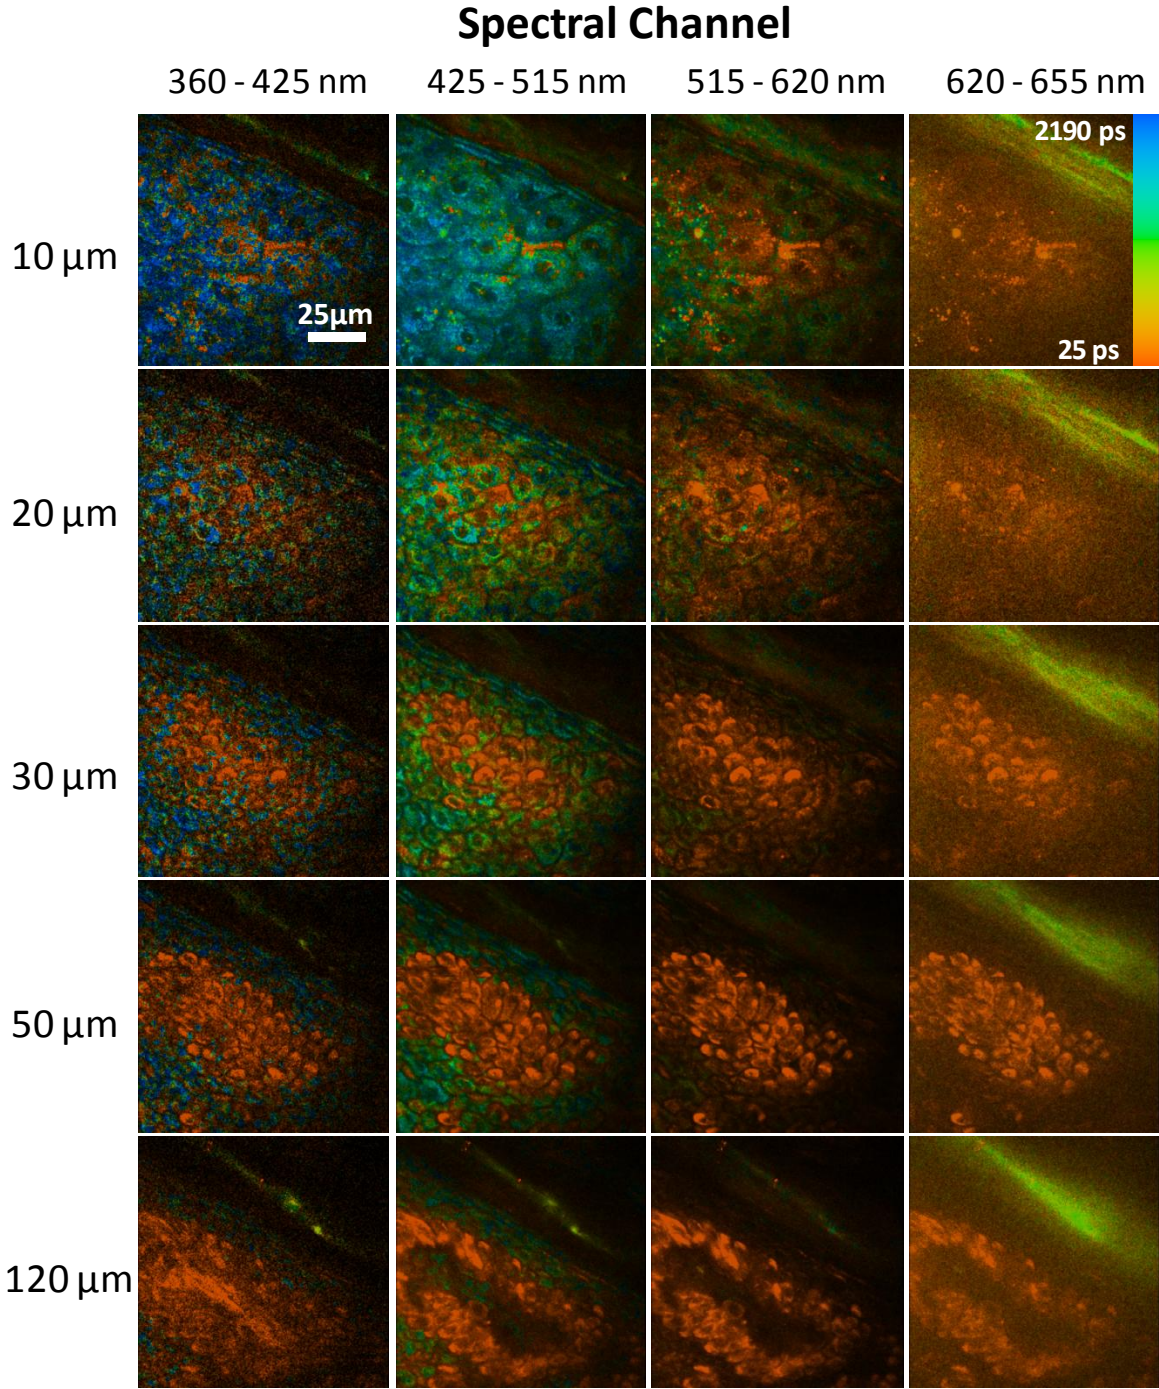

Supplement: S1 (10.1371/journal.pone.0043460.s001) [file journal.pone.0043460.s001]
