# Supplementary material for: Multiphoton Multispectral Fluorescence Lifetime Tomography for the Evaluation of Basal Cell Carcinomas
Source: PLOS journal article supplement (doi:10.1371/journal.pone.0043460), 2012-09-11

**Figure S5** - Bar chart showing sample median ROI/cell mean fluorescence lifetime for BCCs, *in vivo* normal and *ex vivo* normal skin for the four spectral detection channels. Error bars indicate value of 25<sup>th</sup> and 75<sup>th</sup> percentile.

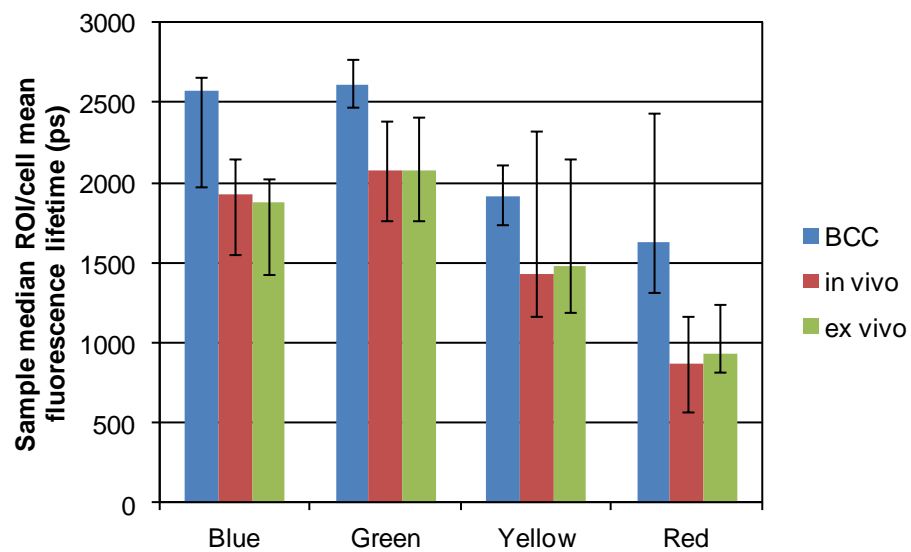

Supplement: S5 (10.1371/journal.pone.0043460.s005) [file journal.pone.0043460.s005]
